# Supplementary material for: The association between alcohol consumption and pulmonary function: a scoping review
Source: PubMed Central journal article supplement — Eur Respir Rev. 2024 May 8;33(172):230233. doi: 10.1183/16000617.0233-2023 (PMC11078152; doi:10.1183/16000617.0233-2023), 2024-05-08
Supplement: ERR-0233-2023.SUPPLEMENT.pdf [file ERR-0233-2023.SUPPLEMENT.pdf]

Appendix: 1

Pubmed:

| Search number | Search Details                                                                                                                                                                                                                                                                                                                                                                                                                                                                                                                                                                                                                        | Results |
|---------------|---------------------------------------------------------------------------------------------------------------------------------------------------------------------------------------------------------------------------------------------------------------------------------------------------------------------------------------------------------------------------------------------------------------------------------------------------------------------------------------------------------------------------------------------------------------------------------------------------------------------------------------|---------|
| 3             | ("Respiratory Function Tests"[MeSH Terms] OR "spirometr*"[Text Word] OR "forced expiratory flow rate*"[Text Word] OR "respiratory function*"[All Fields] OR "respiratory test*"[All Fields] OR "respiratory measure*"[All Fields] OR "pulmonary function*"[Text Word] OR "pulmonary test*"[Text Word] OR "pulmonary measure*"[Text Word] OR "lung function*"[Text Word] OR "lung test*"[Text Word] OR "lung measure*"[Text Word]) AND ("Alcohol Drinking"[MeSH Terms] OR "Alcoholism"[MeSH Terms] OR "Alcoholic Beverages"[MeSH Terms] OR "liqueur*"[Text Word] OR "alcohol*"[Text Word] OR "wine*"[Text Word] OR "beer*"[Text Word]) | 1,675   |
| 2             | "Alcohol Drinking"[MeSH Terms] OR "Alcoholism"[MeSH Terms] OR "Alcoholic Beverages"[MeSH Terms] OR "liqueur*"[Text Word] OR "alcohol*"[Text Word] OR "wine*"[Text Word] OR "beer*"[Text Word]                                                                                                                                                                                                                                                                                                                                                                                                                                         | 481,333 |
| 1             | "Respiratory Function Tests"[MeSH Terms] OR "spirometr*"[Text Word] OR "forced expiratory flow rate*"[Text Word] OR "respiratory function*"[All Fields] OR "respiratory test*"[All Fields] OR "respiratory measure*"[All Fields] OR "pulmonary function*"[Text Word] OR "pulmonary test*"[Text Word] OR "pulmonary measure*"[Text Word] OR "lung function*"[Text Word] OR "lung test*"[Text Word] OR "lung measure*"[Text Word]                                                                                                                                                                                                       | 292,663 |

Embase

| No. | Query                                                                                  | Results |
|-----|----------------------------------------------------------------------------------------|---------|
| #11 | #9 NOT #10                                                                             | 1871    |
| #10 | 'conference abstract'/it                                                               | 4378510 |
| #9  | #5 AND #8                                                                              | 2673    |
| #8  | #6 OR #7                                                                               | 619798  |
| #7  | alcohol*:ti,ab,kw OR wine*:ti,ab,kw OR beer*:ti,ab,kw OR liqueur*:ti,ab,kw             | 552177  |
| #6  | 'alcohol consumption'/exp OR 'alcoholism'/exp OR 'alcoholic beverage'/exp              | 289717  |
| #5  | #1 OR #2 OR #3 OR #4                                                                   | 425314  |
| #4  | 'forced expiratory flow rate*':ti,ab,kw                                                | 277     |
| #3  | spirometr*:ti,ab,kw                                                                    | 42398   |
| #2  | ((lung* OR pulmonar* OR respirator*) NEAR/3 (function* OR test* OR measure*)):ti,ab,kw | 190984  |
| #1  | 'lung function test'/exp OR 'lung function'/exp                                        | 337356  |

## CINAHL

| #   | Query                                     | Limiters/Expanders               | Last Run Via                                                                                                             | Results |
|-----|-------------------------------------------|----------------------------------|--------------------------------------------------------------------------------------------------------------------------|---------|
| S10 | S4 AND S9                                 | Search modes -<br>Boolean/Phrase | Interface - EBSCOhost<br>Research Databases<br>Search Screen - Advanced<br>Search<br>Database - CINAHL with<br>Full Text | 470     |
| S9  | S5 OR S6 OR S7 OR<br>S8                   | Search modes -<br>Boolean/Phrase | Interface - EBSCOhost<br>Research Databases<br>Search Screen - Advanced<br>Search<br>Database - CINAHL with<br>Full Text | 123,795 |
| S8  | liqueur* OR wine* OR<br>beer* OR alcohol* | Search modes -<br>Boolean/Phrase | Interface - EBSCOhost<br>Research Databases<br>Search Screen - Advanced<br>Search<br>Database - CINAHL with<br>Full Text | 123,376 |
| S7  | (MH "Alcoholic<br>Beverages+")            | Search modes -<br>Boolean/Phrase | Interface - EBSCOhost<br>Research Databases<br>Search Screen - Advanced<br>Search<br>Database - CINAHL with<br>Full Text | 5,703   |
| S6  | (MH "Alcoholism")                         | Search modes -<br>Boolean/Phrase | Interface - EBSCOhost<br>Research Databases<br>Search Screen - Advanced<br>Search<br>Database - CINAHL with<br>Full Text | 17,309  |
| S5  | (MH "Alcohol<br>Drinking+")               | Search modes -<br>Boolean/Phrase | Interface - EBSCOhost<br>Research Databases<br>Search Screen - Advanced<br>Search<br>Database - CINAHL with<br>Full Text | 34,487  |
| S4  | S1 OR S2 OR S3                            | Search modes -<br>Boolean/Phrase | Interface - EBSCOhost<br>Research Databases<br>Search Screen - Advanced                                                  | 76,039  |

|    |                                                                         |                               |                                                                                                           |        |
|----|-------------------------------------------------------------------------|-------------------------------|-----------------------------------------------------------------------------------------------------------|--------|
|    |                                                                         |                               | Search Database - CINAHL with Full Text                                                                   |        |
| S3 | "forced expiratory flow rate*" OR spiometr*                             | Search modes - Boolean/Phrase | Interface - EBSCOhost Research Databases Search Screen - Advanced Search Database - CINAHL with Full Text | 9,631  |
| S2 | (lung* OR pulmonar* OR respirator*) N3 (function* OR test* OR measure*) | Search modes - Boolean/Phrase | Interface - EBSCOhost Research Databases Search Screen - Advanced Search Database - CINAHL with Full Text | 33,581 |
| S1 | (MH "Respiratory Function Tests+")                                      | Search modes - Boolean/Phrase | Interface - EBSCOhost Research Databases Search Screen - Advanced Search Database - CINAHL with Full Text | 59,010 |

Cochrane Library:

| ID | Search                                                                                                                                                                                                 | Hits  |
|----|--------------------------------------------------------------------------------------------------------------------------------------------------------------------------------------------------------|-------|
| #1 | MeSH descriptor: [Alcohol Drinking] explode all trees                                                                                                                                                  | 4202  |
| #2 | MeSH descriptor: [Alcoholism] explode all trees                                                                                                                                                        | 3881  |
| #3 | MeSH descriptor: [Alcoholic Beverages] explode all trees                                                                                                                                               | 549   |
| #4 | (liqueur* OR alcohol* OR wine* OR beer*):ti,ab,kw                                                                                                                                                      | 34623 |
| #5 | #1 OR #2 OR #3 OR #4                                                                                                                                                                                   | 34638 |
| #6 | MeSH descriptor: [Respiratory Function Tests] explode all trees                                                                                                                                        | 24775 |
| #7 | (spiometr* OR forced expiratory flow rate* OR "respiratory function*" OR "respiratory test*" OR "respiratory measure*" OR "pulmonary function*" OR "pulmonary test*" OR "pulmonary measure*"):ti,ab,kw | 20146 |
| #8 | #6 or #7                                                                                                                                                                                               | 36959 |
| #9 | #5 and #8                                                                                                                                                                                              | 349*  |

1 Cochrane Review – 348 Trials
